# Supplementary material for: The Role of Annexin A1 in DNA Damage Response in Placental Cells: Impact on Gestational Diabetes Mellitus
Source: MDPI journal article supplement (doi:10.3390/ijms241210155), 2023-06-15
Supplement: s1 [file s1]

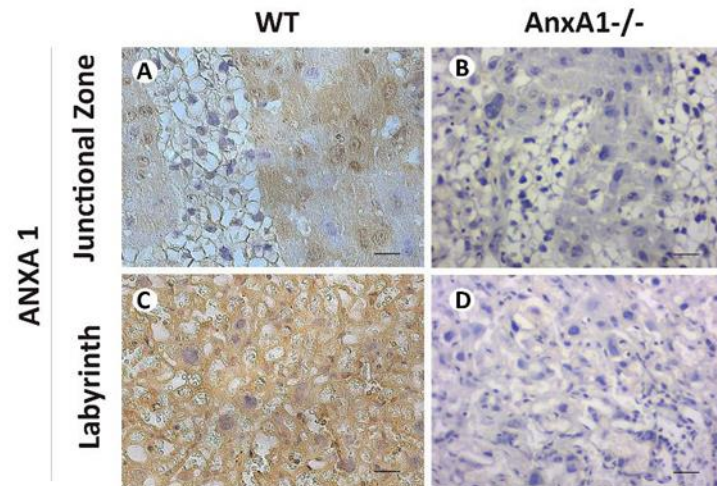

*Figure S1. Immunolocalization of ANXA1 in placenta sections from WT (A and C) and AnxA1<sup>-/-</sup> (B and D) animals. (A-C) Placental cells reactive to ANXA1 are found in both junctional and labyrinthine placental zones with a similar pattern of immunoreactivity. (B and D) No AnxA1 reactive placental cells were observed in AnxA1<sup>-/-</sup> group, confirming the ANXA1 knockout model. (A-D) Immunoperoxidase and hematoxylin counterstaining; Bars = 50  $\mu$ m; n=3/group.*

Table S1: Histological analysis of ND and GDM human placentas

|                                 | ND (n=10) | GDM (n=10) |
|---------------------------------|-----------|------------|
| Fibrin deposition score         | 1         | 4          |
| Syncytiotrophoblast knots score | 0         | 3          |

Semiquantitative scoring system for histological analysis of ND and GDM human placentas: Score 0: normal; 1: event occurring in less than 25% of the field; 2: 25 to 50% of the field; 3: 51% to 75% of the field and 4 more than 75% of the field. Adapted from Meyerholz & Beck (2018) [39].
